# Supplementary material
Source: PubMed Central journal article supplement (PMC8718948)
Supplement: mmc1.pdf [file mmc1.pdf]

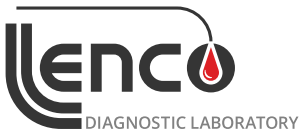

1857 86 Street  
 Brooklyn, NY 11214  
 Tel: (718) 232 - 1515  
 Fax: (718) 232 - 1550  
 Email: info@lencolab.com  
 http://www.lencolab.com

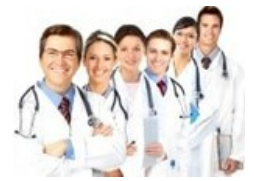

## LABORATORY REPORT

|                                                      |                   |                   |                                                                     |
|------------------------------------------------------|-------------------|-------------------|---------------------------------------------------------------------|
| <b>Name:</b>                                         | <b>Phone:</b>     | <b>Accession:</b> | <b>4186349</b> <span style="float: right;"><b>FINAL COPY</b></span> |
| Patient #: L551099                                   | Birth: 03/27/1977 | Fasting:          | Yes                                                                 |
| Doctor: MURDAKHAYEV, RADIK                           | Age: 43           | Collection Date:  | 4/28/2020 5:24:00 PM                                                |
| Doctor Address: 919 2ND AVENUE<br>NEW YORK, NY 10017 | Gender: M         | Received in Lab:  | 4/28/2020 8:33:50 PM                                                |
|                                                      |                   | Date Reported:    | 5/1/2020 1:34:17 AM                                                 |

### Clinical Abnormalities Summary:

(May not contain all abnormal results; narrative results may not have abnormal flags. Please review entire report.)

**SARS-CoV-2 IgG: REACTIVE**

**SARS-CoV-2 IgG, Num: 7.084 Abnormal**

| Test                                                                                                                                                                                                                                                                                                                                                                                                                                                                                                                                                                                                                                                                                                                                                                                                                      | Result       | Abnormal              | Reference    | Units | Reported | Prior Result | Date |
|---------------------------------------------------------------------------------------------------------------------------------------------------------------------------------------------------------------------------------------------------------------------------------------------------------------------------------------------------------------------------------------------------------------------------------------------------------------------------------------------------------------------------------------------------------------------------------------------------------------------------------------------------------------------------------------------------------------------------------------------------------------------------------------------------------------------------|--------------|-----------------------|--------------|-------|----------|--------------|------|
| <b>COVID 19 IGG, SERUM</b>                                                                                                                                                                                                                                                                                                                                                                                                                                                                                                                                                                                                                                                                                                                                                                                                |              |                       |              |       |          |              |      |
| SARS-CoV-2 IgG                                                                                                                                                                                                                                                                                                                                                                                                                                                                                                                                                                                                                                                                                                                                                                                                            |              | <b>REACTIVE</b>       | NON-REACTIVE |       | 5/1/2020 |              |      |
| <p>THIS TEST IS PERFORMED USING THE DIAZYME DZ-LITE SARS-COV-2 IGG CLIA KIT, WHICH IS AN INDIRECT CHEMOLUMINESCENCE IMMUNOASSAY.</p> <p>THIS TEST HAS NOT BEEN REVIEWED BY THE FDA. DIAZYME HAS VALIDATED THE ASSAY AND SUBMITTED THEIR VALIDATION FOR EUA APPROVAL.</p> <p>NEGATIVE RESULTS DO NOT RULE OUT SARS-COV-2 INFECTION, PARTICULARLY IN THOSE WHO HAVE BEEN IN CONTACT WITH THE VIRUS. FOLLOW-UP TESTING WITH A MOLECULAR DIAGNOSTIC SHOULD BE CONSIDERED TO RULE OUT INFECTION IN THESE INDIVIDUALS.</p> <p>RESULTS FROM ANTIBODY TESTING SHOULD NOT BE USED AS THE SOLE BASIS TO DIAGNOSE OR EXCLUDE SARS-COV-2 INFECTION OR TO INFORM INFECTION STATUS. POSITIVE RESULTS MAY BE DUE TO PAST OR PRESENT INFECTION WITH NON-SARS-COV-2 CORONAVIRUS STRAINS SUCH AS CORONAVIRUS HKU1, NL63, OC43, OR 229E.</p> |              |                       |              |       |          |              |      |
| SARS-CoV-2 IgG, Num                                                                                                                                                                                                                                                                                                                                                                                                                                                                                                                                                                                                                                                                                                                                                                                                       |              | <b>7.084 Abnormal</b> | <1           | AU/mL | 5/1/2020 |              |      |
| <p>THE VALUE REPORTED IS EXPRESSED IN ARBITRARY UNITS AND REPRESENTS A RELATIVE AMOUNT OF POSITIVE SIGNAL IN THE ASSAY. THE ASSAY IS LINEAR FROM 1-50 AU. THE ANTIBODY IS CONSIDERED NOT DETECTED WHEN THE AU IS &lt;1.</p>                                                                                                                                                                                                                                                                                                                                                                                                                                                                                                                                                                                               |              |                       |              |       |          |              |      |
| <b>COVID 19 IGM, SERUM</b>                                                                                                                                                                                                                                                                                                                                                                                                                                                                                                                                                                                                                                                                                                                                                                                                |              |                       |              |       |          |              |      |
| SARS-CoV-2 IgM                                                                                                                                                                                                                                                                                                                                                                                                                                                                                                                                                                                                                                                                                                                                                                                                            | NON-REACTIVE |                       | NON-REACTIVE |       | 5/1/2020 |              |      |
| <p>THIS TEST IS PERFORMED USING THE DIAZYME DZ-LITE SARS-COV-2 IGM CLIA KIT, WHICH IS AN INDIRECT CHEMOLUMINESCENCE IMMUNOASSAY.</p> <p>THIS TEST HAS NOT BEEN REVIEWED BY THE FDA. DIAZYME HAS VALIDATED THE ASSAY AND SUBMITTED THEIR VALIDATION FOR EUA APPROVAL.</p> <p>NEGATIVE RESULTS DO NOT RULE OUT SARS-COV-2 INFECTION, PARTICULARLY IN THOSE WHO HAVE BEEN IN CONTACT WITH THE VIRUS. FOLLOW-UP TESTING WITH A MOLECULAR DIAGNOSTIC SHOULD BE CONSIDERED TO RULE OUT INFECTION IN THESE INDIVIDUALS.</p> <p>RESULTS FROM ANTIBODY TESTING SHOULD NOT BE USED AS THE SOLE BASIS TO DIAGNOSE OR EXCLUDE SARS-COV-2 INFECTION OR TO INFORM INFECTION STATUS. POSITIVE RESULTS MAY BE DUE TO PAST OR PRESENT INFECTION WITH NON-SARS-COV-2 CORONAVIRUS STRAINS SUCH AS CORONAVIRUS HKU1, NL63, OC43, OR 229E.</p> |              |                       |              |       |          |              |      |
| SARS-CoV-2 IgM, Num                                                                                                                                                                                                                                                                                                                                                                                                                                                                                                                                                                                                                                                                                                                                                                                                       | < 1          |                       | <1           | AU/mL | 5/1/2020 |              |      |
| <p>THE VALUE REPORTED IS EXPRESSED IN ARBITRARY UNITS AND REPRESENTS A RELATIVE AMOUNT OF POSITIVE SIGNAL IN THE ASSAY. THE ASSAY IS LINEAR FROM 1-10 AU. THE ANTIBODY IS CONSIDERED NOT DETECTED WHEN THE AU IS &lt;1.</p>                                                                                                                                                                                                                                                                                                                                                                                                                                                                                                                                                                                               |              |                       |              |       |          |              |      |
